# Supplementary material for: Effects of orally applied butyrate bolus on histone acetylation and cytochrome P450 enzyme activity in the liver of chicken – a randomized controlled trial
Source: Springer Nature journal article supplement (doi:10.1186/1743-7075-10-12), 2013-01-22

**A****Acetylation of Histone H2A**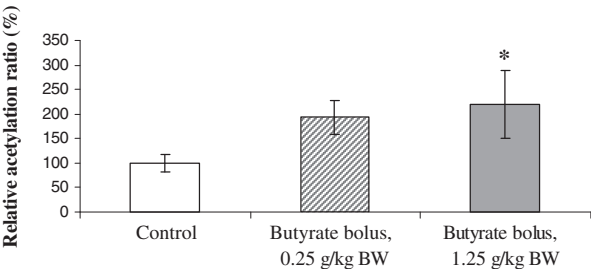**B****Acetylation of Histone H2B**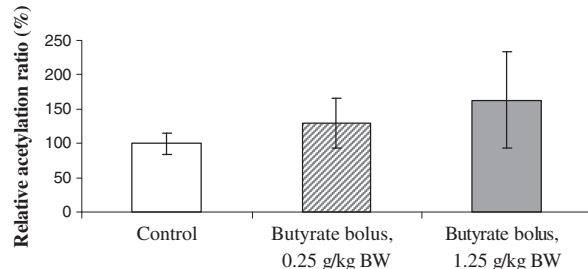**C****Acetylation of Histone H3**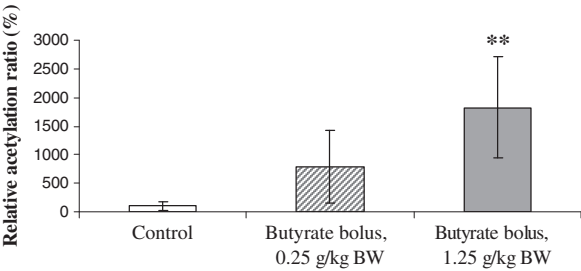**D****Acetylation of Histone H4**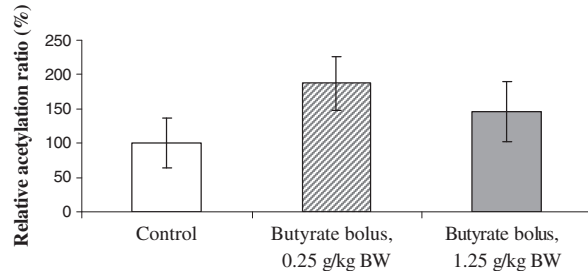

Supplement: 12986_2012_504_MOESM1_ESM.pdf [file 12986_2012_504_MOESM1_ESM.pdf]
