# Supplementary material for: Effects of orally applied butyrate bolus on histone acetylation and cytochrome P450 enzyme activity in the liver of chicken – a randomized controlled trial
Source: Springer Nature journal article supplement (doi:10.1186/1743-7075-10-12), 2013-01-22
Supplement: 12986_2012_504_MOESM3_ESM.pdf [file 12986_2012_504_MOESM3_ESM.pdf]

**A****Aminopyrine N-demethylation** $\mu\text{mol/min per mg protein}$ 0,35  
0,3  
0,25  
0,2  
0,15  
0,1  
0,05  
0

Control

Butyrate bolus,  
0,25 g/kg BWButyrate bolus,  
1,25 g/kg BW

Phenobarbital

\*\*

**B****Aniline-hydroxylation** $\mu\text{mol/min per mg protein}$ 0,09  
0,08  
0,07  
0,06  
0,05  
0,04  
0,03  
0,02  
0,01  
0

Control

Butyrate bolus,  
0,25 g/kg BWButyrate bolus,  
1,25 g/kg BW

Phenobarbital

\*\*
